# Supplementary material for: Alternative dynamic regimes of plankton communities in perturbed environments
Source: Copernicus journal article supplement (doi:10.5194/egusphere-2025-2994), 2025-07-28
Supplement: Supplementary file [file egusphere-2025-2994-RC2-supplement.pdf]

This manuscript presents a systematic numerical investigation of alternative dynamic regimes in a marine biogeochemical model. Overall, the experimental design is well-considered, and the exploration of hysteresis under extreme forcing is conceptually valuable. However, I have several major concerns regarding the experimental setup's realism, the manuscript's accessibility, and the interpretation of its findings. These issues currently limit the study's impact and the generalizability of its conclusions.

1. The core experimental design applies constant, extreme environmental forcings over 45-year periods (and up to 100 years in confirmatory runs) to reach a new steady state. While this is a standard numerical technique for bifurcation analysis, its connection to real ocean dynamics is not straightforward.

1) The real ocean is characterized by stochastic variability, episodic extreme events, and trends superimposed on seasonal cycles, not by decades of static, extreme conditions. Consequently, it is not straightforward to interpret what the discovered "regimes" and hysteresis loops mean for real plankton communities experiencing climate change. To me, these experiments can be interpreted as revealing potential system properties and thresholds. I would encourage the authors to make the interpretation and the ecological relevance of their experiments clearer in the manuscript.

2) Another issue is the physical plausibility of running a 1D water column model for 45-100 years under constant or altered forcing. A key limitation of 1D models is the lack of horizontal advection, which in the real ocean is essential for maintaining heat and salt budgets. Under constant surface forcing, a 1D model is prone to unphysical drift in temperature and salinity due to the absence of compensating horizontal fluxes (e.g., oceanic heat transport, lateral freshwater inputs). Did such a drift occur in your simulations? If so, how was it controlled or accounted for (e.g., through strong relaxation to observed profiles)? If not, please explain the physical rationale for the stability of the water column over such long timescales in this model setup.

3) Some of the applied perturbations (e.g., wind increase of +15 m/s, temperature increase of 15 degree, phosphate reduction to near-zero) appear exceptionally strong. Please comment on whether these ranges are physically plausible or should be viewed as purely theoretical limits.

2. The manuscript assumes considerable prior familiarity with the 1D model configuration and the BOUSSOLE site, which hinders comprehension.

1) A brief overview of the BOUSSOLE site is helpful (e.g., depth, typical seasonal stratification dynamics, trophic status) would help readers understand why the system responds to perturbations in particular ways (e.g., sensitivity to light vs. nutrients).

2) A concise summary (preferably with a figure or a clear paragraph) of the model's performance under unperturbed, climatological forcing is missing. Showing the modeled seasonal cycles of key variables (e.g., mixed layer depth, surface nutrients, chlorophyll) would establish a critical baseline and make the perturbed experiment results much easier to interpret.

3) The selection of specific forcings (especially phosphate and oxygen nudging), model parameters (10 were chosen), and target indicators (e.g., oxygen production, N remineralization) appears arbitrary without clear justification. Please provide a rationale for these choices early in the Methods. E.g., why are phosphate and oxygen selected for nudging? How were the 10 biogeochemical parameters chosen? What is the ecological significance of the selected target indicators?

4) Consider moving Section 2.4 (“Nudging of biogeochemical variables”) before Section 2.3 (“Experiments setup”). This would help readers understand the experimental design from the outset.

3. The study draws broad conclusions about “marine biogeochemical models”, yet all experiments, despite the perturbations of key physical forcings (wind, temperature), are conducted within the specific physical and ecological context of a single 1D location in the Mediterranean. While the applied perturbations are theoretically general, the baseline state of the system (e.g., its characteristic depth, stratification regime, initial nutrient levels, and plankton community) will strongly modulate the response. Therefore, the representativeness of the specific hysteresis thresholds and reversible behaviors found here for other regions (e.g., high-latitude seas or coastal upwelling zones with fundamentally different physical and biogeochemical dynamics) remains uncertain. The Discussion should explicitly address this limitation and speculate on how different baseline physical regimes might alter the propensity for, and manifestation of, hysteresis.

4. The sensitivity analysis (EXP-BGC) perturbs parameters within a fixed model structure. It is widely recognized that structural differences between models (e.g., food-web complexity, representations of remineralization) often cause greater divergence in projections than parameter variations alone. Therefore, the finding here should be softened to state that the model’s response is robust to parameter uncertainty within this specific model structure. A discussion on how missing or oversimplified processes might influence the results is warranted.

5. Some organizational and presentational issues

1) The title emphasizes “plankton communities”, but the results focus predominantly on biogeochemical flux indicators (chlorophyll peaks, DCM metrics, integrated production/remineralization). Shifts in plankton community composition (PFT biomass ratios) are mentioned but are not the primary lens of analysis. The title, abstract, and discussion should be aligned to accurately reflect the paper’s focus, which is currently more on biogeochemical function regimes than on detailed community ecology.

2) Figure 2 is helpful, but the textual descriptions in Section 2.3 remain difficult to follow. Each experiment should be introduced with a clearer, plain-language statement of its objective before delving into technical details.

3) The Discussion section currently reads somewhat like an extended interpretation of Results. While relevant literature is mentioned, the connections could be made more explicit and systematic. I suggest streamlining the discussion to better synthesize the core take-home messages from all experiments into a coherent narrative, explicitly compare and contrast the findings with the existing literature on regime shifts and hysteresis, and more clearly explore the implications of the work (e.g., for model development or for detecting early warnings) alongside its limitations and future directions.

Minor comments

L12-13: this sentence needs to be rephrased. It might lead readers to infer that the specific mechanisms simulated under the model’s idealized setup have been directly validated by corresponding field measurements.

L48: “whether”

L85: “nitrate, phosphate, and silicate”

L86: should it be nitrate instead of ammonium?

L105: hard to follow why “stable states” are referred to as “dynamic regimes”

L106-109: hard to follow. Please rephrase.

L120: X instead of x?

L127: The caption of Fig. 1 indicates  $p = 18$ . Could you clarify whether the term “higher  $p$ ” in the text refers specifically to values like 18, or whether hysteresis would also occur for moderately elevated values such as  $p = 2$  or 3?

L140: delete the extra “a”

L150: Please clarify why the perturbation to species concentrations is applied only at the start of the second (backward) set of simulations, and not in the first (forward) set.

L151-152: The description of the perturbation to intracellular quotas is difficult to follow, primarily due to a lack of context about how these quota elements are defined and function within the model. A brief explanatory note would be helpful.

L214-215: fix the grammar

L221: where are these results presented?

L317–318: Please specify the primary climate-driven process postulated to increase SPM. Please also acknowledge contrasting drivers, such as anthropogenic reductions in sediment loads due to dam construction, which can decrease SPM and increase light availability.

L343: caused on -> caused by

L409: consistently -> consistent

Figure 1 (right panel) and its subsequent appearances (Figs. 3 & 4) include a gray line labeled as the “unstable dynamic regimes” of the Hill model. However, the main text provides no explanation of what an “unstable dynamic regime” represents in this context, how it is numerically identified or achieved in the model, or what its ecological interpretation might be. This omission makes the figure difficult to interpret. More importantly, while the theoretical Hill model plot includes these unstable branches, none of the actual numerical experiments with the BFM show or discuss analogous unstable states. Please consider clarifying in the text or simplifying the figure.

Figures 3 & 4: The bottom right panel is labeled “Annual Production”, but its Y-axis is labeled “Total N remin. (0–100m) [mmol N/m<sup>2</sup>]”. Please correct the label to accurately reflect the variable being plotted.

Figure 4: The caption states that “Hysteresis occurs only for a strong decrease in the phosphate nudging and is highlighted by a red circle.” However, the two data points (triangles) enclosed within the red circle appear very close in value. Please clarify the quantitative criterion used to define this separation as a hysteresis loop.

Figure 5: In both the first and fourth columns of panels, a text box containing the number “0” is present. Please explain the meaning of this annotation in the figure caption.

Figure 6: The Y-axis label for the CV appears to include units. Isn't CV a dimensionless ratio?

Table 1 caption: annual mean instead of mean?

Table 2: In multiple rows, “July August” is listed without punctuation or conjunction.

Supplement: several text paragraphs currently placed at the end of Fig. S11 appear to be part of the general model description.
